# Supplementary material for: Good Immunogenicity of Delayed Second Dose of BNT162b2 Vaccine in Individuals with Acute Allergic-like Reactions after the First Dose
Source: MDPI journal article supplement (doi:10.3390/reports5040048), 2022-12-01
Supplement: s1 [file s1]

*Brief Report*

# Good Immunogenicity of Delayed Second Dose of BNT162b2 Vaccine in Individuals with Acute Allergic-Like Reactions after the First Dose

Kazuhiro Araki <sup>1,\*</sup>, Nobuaki Shimizu <sup>2</sup>, Misa Iijima <sup>3</sup>, Hisashi Hosaka <sup>4</sup> and Yasuhiro Yanagita <sup>5</sup>

<sup>1</sup> Department of Medical Oncology, Gunma Prefectural Cancer Center, Ota City 373-8550, Gunma, Japan

<sup>2</sup> Department of Urology, Gunma Prefectural Cancer Center, Ota City 373-8550, Gunma, Japan

<sup>3</sup> Department of Pathology, Gunma Prefectural Cancer Center, Ota City 373-8550, Gunma, Japan

<sup>4</sup> Department of Gastrointestinal Medicine, Gunma Prefectural Cancer Center, Ota City 373-8550, Gunma, Japan

<sup>5</sup> Department of Breast Oncology, Gunma Prefectural Cancer Center, Ota City 373-8550, Gunma, Japan

\* Correspondence: kaz-araki@gunma-cc.jp; Tel.: +81-246-38-0771

**Supplemental table S1. Distribution of anti-spike protein immunoglobulin G titers (AU/mL) of BNT162b2 vaccine in the initial six participants.**

| ID             | GCC01 | GCC02 | GCC03 | GCC04 | GCC05 | GCC06 | GMT  |
|----------------|-------|-------|-------|-------|-------|-------|------|
| After 1st dose | 1     | 3.09  | 1.68  | 3.73  | 5.20  | 2.41  | 2.50 |
| After 2nd dose | 5.44  | 6.28  | 7.16  | 8.52  | 9.65  | 7.08  | 7.22 |
| After 3M       | 4.23  | 3.61  | 4.50  | 5.86  | 6.85  | 4.48  | 4.81 |
| After 6M       | 4.15  | 2.81  | 4.22  | 5.19  | 5.86  | 4.04  | 4.27 |
| After 9M       | 3.85  | 2.41  | 3.79  | 4.13  | 5.22  | 3.54  | 3.73 |
| After 3rd dose | 8.04  | 8.72  | 9.86  | 10.25 | 11.29 | 9.36  | 9.53 |

ID: identification number; GCC01-06; each participant; GMT: geometric mean titer.
